# Supplementary material for: Protoplast Isolation, Fusion, Culture and Transformation in the Woody Plant Jasminum spp.
Source: MDPI journal article supplement (doi:10.3390/agriculture11080699), 2021-07-26
Supplement: s1 [file s1]

**Table S1.** Callus induction rate of stem segments and leaves under different induction media of *J. sambac* and *J. mesnyi*.

| Type of media    | Type of explant | Number of explant | Callus formation | Induction rate <sup>1</sup> % |
|------------------|-----------------|-------------------|------------------|-------------------------------|
| <i>J. sambac</i> |                 |                   |                  |                               |
| MS               | Stems           | 179               | 59               | 32.96                         |
|                  | Leaves          | 180               | 66               | 36.66                         |
| WPM              | Stems           | 179               | 162              | 90.50                         |
|                  | Leaves          | 180               | 96               | 53.33                         |
| <i>J. mesnyi</i> |                 |                   |                  |                               |
| MS               | Stems           | 185               | 38               | 21.54                         |
|                  | Leaves          | 180               | 88               | 48.88                         |
| WPM              | Stems           | 180               | 155              | 86.11                         |
|                  | Leaves          | 180               | 112              | 62.22                         |

<sup>1</sup>No statistical test on these data.

WPM + combination of auxin & cytokinin at higher concentration (mg/L)

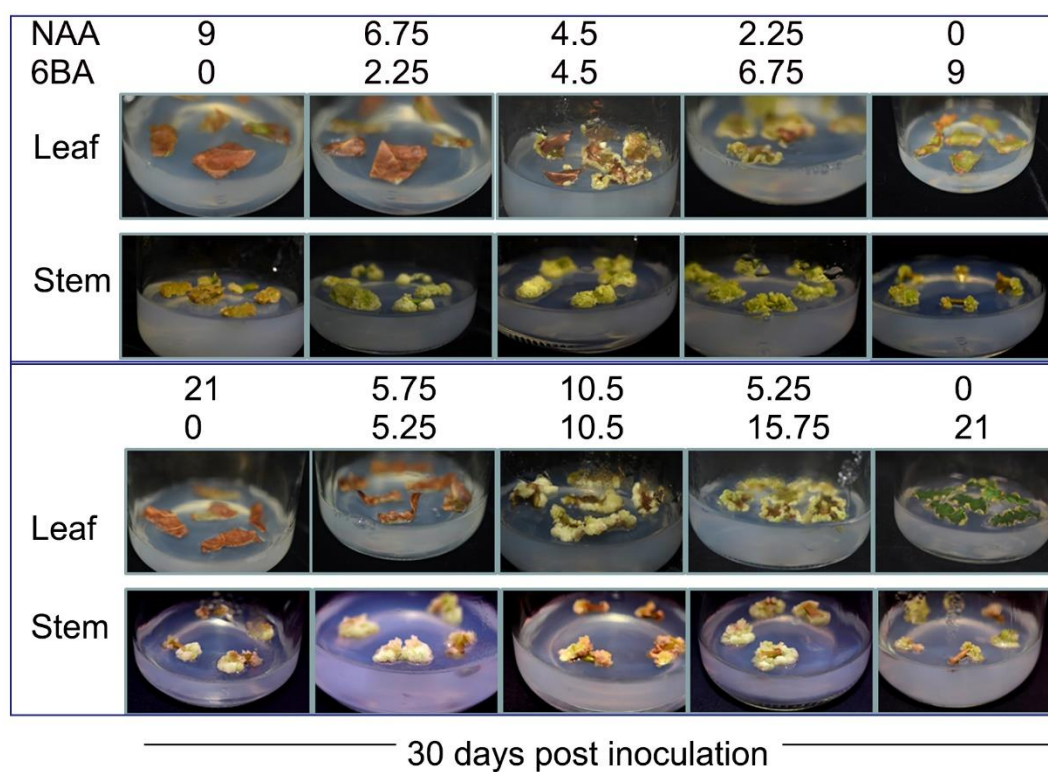

Figure S1: Effect of 6-BA and NAA on callus induction.
